# Supplementary material for: Ternary complex structures of human farnesyl pyrophosphate synthase bound with a novel inhibitor and secondary ligands provide insights into the molecular details of the enzyme’s active site closure
Source: PubMed Central journal article supplement (PMC3539973; doi:10.1186/1472-6807-12-32), 2012-12-12
Supplement: 1472-6807-12-32-S1.pdf [file 1472-6807-12-32-S1.pdf]

---

| <b>Human FPPS<br/>Structure</b>  | <b>Overall<br/>average B-factor (<math>\text{\AA}^2</math>)</b> | <b>Average B-factor (<math>\text{\AA}^2</math>)<br/><sup>350</sup>KRRK<sup>353</sup> tail</b> |
|----------------------------------|-----------------------------------------------------------------|-----------------------------------------------------------------------------------------------|
| Pi-bound complex<br>[PDB: 4H5C]  | 41.2                                                            | 85.7                                                                                          |
| PPi-bound complex<br>[PDB: 4H5D] | 40.7                                                            | 47.4                                                                                          |
| IPP-bound complex<br>[PDB: 4H5E] | 44.8                                                            | 52.9                                                                                          |

---
